# Supplementary material
Source: PubMed Central journal article supplement (PMC3296457)
Supplement: supp_11-1026_Online_Supplement.pdf [file supp_11-1026_Online_Supplement.pdf]

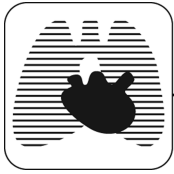

## Association Between Airway Caliber Changes With Lung Inflation and Emphysema Assessed by Volumetric CT Scan in Subjects With COPD

*Alejandro A. Diaz, MD; Carolyn E. Come, MD; James C. Ross, MS; Raúl San José Estépar, PhD; MeiLan K. Han, MD; Stephen H. Loring, MD; Edwin K. Silverman, MD, PhD; and George R. Washko, MD; for the COPDGene Investigators*

### e-Appendix 1.

#### Methods

##### Study population

COPDGene ([www.copdgene.org](http://www.copdgene.org)) is a multi-center study examining genetic and epidemiologic risk factors for COPD and smoking-related lung diseases in non-Hispanic white and African-American smokers.<sup>1</sup> From November of 2007 to October of 2009 the first 2500 smokers (with at least 10 pack years of smoking) between the ages of 45 and 80 were enrolled into COPDGene. For this study, we selected a subset of subjects based on GOLD (Global Initiative for Obstructive Lung Disease) stages of COPD<sup>2</sup> and CT phenotypes. These phenotypes were defined as AP or EP based upon CT measures of emphysema (<13 or  $\geq$ 25%, respectively)<sup>3</sup>. Because of the limited number of subjects available with GOLD-4 stage and an AP, we first clustered all these subjects (N=23) into this group. Then, this group was age-, gender-, scanner brand-, and center-matched with GOLD-2-AP, GOLD-2-EP, and GOLD-4-EP groups (N=23 each group) and with a control group (N=46) with normal lung function and no emphysema on CT scans. Usually subjects were evaluated in 1 or 2 visits, in which the questionnaires and pulmonary functions tests were taken first and then CT scanning. In the present study, 118 out of 138 subjects had the date and time of both spirometry and of CT scanning available. In 96 subjects the spirometry was performed first and in 22 the CT

*Online supplements are not copyedited prior to posting.*



scanning. The median (interquartile range) time between postbronchodilator spirometry and the following CT scanning was 78 (53-96) minutes.

### Clinical and Physiologic Assessments

Demographic and clinical history data were collected with standardized instruments. Dyspnea was measured with the modified Medical Research Council Score.<sup>4</sup> Spirometry was performed at each center in accordance with American Thoracic Society/European Respiratory Society recommendations<sup>5</sup> with an ndd EasyOne™ spirometer (Zurich, Switzerland) before and 20 minutes after two puffs (180 mcg) of albuterol administration. [The postbronchodilator forced expiratory volume in one second](#) and forced vital capacity were expressed as percentages of predicted values using standardized prediction equations.<sup>6</sup> Exercise capacity was assessed with a standardized six-minute walk test.

### Airway distensibility

We expressed airway distensibility as the ratio of absolute change in airway inner diameter (in mm) to the cubic root of absolute change in lung volume (in deciliters) from end tidal breathing to total full inspiration<sup>7</sup>. The ratio was calculated with whole-lung and lobar data sets and called global and *lobar* airway distensibility, respectively. Each ratio was calculated with the following formula:

Global airway distensibility:

$$\frac{(\text{Airway diameter [AD] of the 3}^{\text{rd}} / 4^{\text{th}}\text{-AG at full inspiration} - \text{AD of the 3}^{\text{rd}} / 4^{\text{th}}\text{-AG at end tidal breathing})}{(\text{Whole-lung volume at full inspiration} - \text{Whole lung volume at end tidal breathing})^{1/3}}$$

Airway diameters of the 3<sup>rd</sup> or 4<sup>th</sup> airway generations (AG) from the right upper lobe (RUL) apical bronchus (RB1) and the right lower lobe (RLL) posterior bronchus (RB10) were identified and matched on inspiratory and expiratory paired CT scans. We chose these two bronchi because their generally perpendicular orientation to the

*Online supplements are not copyedited prior to posting.*



axial CT scanning plane. Then we measured all segments individually and averaged all 3<sup>rd</sup>-AG and 4<sup>th</sup>-AG diameter measurements. Measures of airway lumen area and total airway area and calculations of wall area percent were all performed following same steps as lumen diameters. Analyses using global airway distensibility were always performed with whole-lung emphysema measure.

*Lobar* airway distensibility for RUL:

$$\frac{(\text{Airway diameter [AD] of the RB1 3}^{\text{rd}} / 4^{\text{th}}\text{-AG at full inspiration} - \text{AD of the RB1 3}^{\text{rd}} / 4^{\text{th}}\text{-AG at end tidal breathing})}{(\text{Volume of RUL at full inspiration} - \text{Volume of RUL at end tidal breathing})^{1/3}}$$

*Lobar* airway distensibility for RLL:

$$\frac{(\text{Airway diameter [AD] of the RB10 3}^{\text{rd}} / 4^{\text{th}}\text{-AG at full inspiration} - \text{AD of the RB10 3}^{\text{rd}} / 4^{\text{th}}\text{-AG at end tidal breathing})}{(\text{Volume of RLL at TLC} - \text{Volume of RLL at end tidal breathing})^{1/3}}$$

An airway inner diameter was calculated for the 3<sup>rd</sup> and the 4<sup>th</sup> airway generations of RB1 and RB10 bronchi by averaging the three measures obtained in each segment; lobar volume changes for the RUL and RLL were used to calculate the denominator. Analyses using *lobar* airway distensibility always were performed with lobar emphysema data of RUL and RLL.

### **CT examination**

Images acquisition parameters by scanner (Tables 1A and 1B) used by the subset of subjects of this study. Data were taken from the COPDGene website ([www.copdgene.org](http://www.copdgene.org)).

*Online supplements are not copyedited prior to posting.*

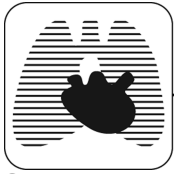

### **CT measures of emphysema and lung volumes**

The lung volumes were calculated as volume of the lung mask minus the central airways for each CT scan by using Airway Inspector software as described elsewhere. RUL and RLL measures of volume and emphysema were obtained from the COPD Gene Image Analysis Core (N=130). This data was obtained with VIDA software (Iowa City, IA). For the analyses looking at *lobar* airway distensibility, COPD patients within a GOLD stage were classified as EP or AP depending on whether their lobar emphysema value fell above or below the median lobar emphysema value, respectively. We used this approach because the groups using whole-lung or lobar emphysema were almost identical and thus comparable.

*Online supplements are not copyedited prior to posting.*

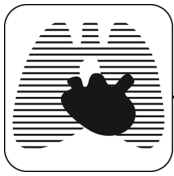

**e-Table 1A** Inspiratory Volumetric Computed Tomography Protocol

### Inspiratory CT

|                    |             |             |                       |                       |
|--------------------|-------------|-------------|-----------------------|-----------------------|
| Scanner make       | GE          | GE          | SIEMENS               | SIEMENS               |
| Scanner model      | LS 16       | VCT-64      | Sensation-16          | Sensation-64          |
| Scan Type          | Helical     | VCT Helical | Spiral                | Spiral                |
| Rotation Time (s)  | See mA      | See mA      | 0.5                   | 0.5                   |
| Det. Configuration | 16 x 0.625  | 64 x 0.625  | 16 x 0.75             | 64 x 0.6              |
| Pitch              | 1.375       | 1.375 mm    | 1.1                   | 1.1                   |
| Speed (mm/rot)     | 13.75       | 13.75       | 13.2                  | 21.1                  |
| kVp                | 120         | 120         | 120                   | 120                   |
| mA                 | 400 @ 0.5s  | 400 @ 0.5s  | Effective<br>mAs: 200 | Effective<br>mAs: 200 |
| Dose modulation    | Auto-mA off | Off         | CARE<br>Dose 4D off   | CARE<br>Dose 4D off   |
| Reconstructions    |             |             |                       |                       |
| RECON1             |             |             |                       |                       |
| Algorithm          | BONE        | BONE        | B46f                  | B46f                  |
| Thickness (mm)     | 0.625       | 0.625       | 0.75                  | 0.75                  |
| Interval (mm)      | 0.625       | 0.625       | 0.5                   | 0.5                   |
| DFOV (cm)          | Lungs*      | Lungs*      | Lungs*                | Lungs*                |
| RECON 2            |             |             |                       |                       |
| Algorithm          | Standard    | Standard    | B31f                  | B31f                  |
| Thickness (mm)     | 0.625       | 0.625       | 0.625                 | 0.75                  |
| Interval (mm)      | 0.625       | 0.625       | 0.5                   | 0.5                   |
| DFOV (cm)          | Lungs*      | Lungs*      | Lungs*                | Lungs*                |

\* reconstruction field of view should encompass the widest diameter of the lung.

*Online supplements are not copyedited prior to posting.*



**e-Table 1B** Expiratory Volumetric Computed Tomography Protocol

### Expiratory CT

|                    |             |             |                      |                      |
|--------------------|-------------|-------------|----------------------|----------------------|
| Scanner make       | GE          | GE          | SIEMENS              | SIEMENS              |
| Scanner model      | LS 16       | VCT-64      | Sensation-16         | Sensation-64         |
| Scan Type          | Helical     | VCT Helical | Spiral               | Spiral               |
| Rotation Time (s)  | See mA      | See mA      | 0.5                  | 0.5                  |
| Det. Configuration | 16 x 0.625  | 64 x 0.625  | 16 x 0.75            | 64 x 0.6             |
| Pitch              | 1.375       | 1.375 mm    | 1.1                  | 1.1                  |
| Speed (mm/rot)     | 13.75       | 13.75       | 13.2                 | 21.1                 |
| kVp                | 120         | 120         | 120                  | 120                  |
| MA                 | 100 @ 0.5s  | 100 @ 0.5s  | Effective<br>mAs: 50 | Effective<br>mAs: 50 |
| Dose modulation    | Auto-mA off | Off         | CARE<br>Dose 4D off  | CARE<br>Dose 4D off  |
| Reconstructions    |             |             |                      |                      |
| RECON1             |             |             |                      |                      |
| Algorithm          | BONE        | BONE        | B46f                 | B46f                 |
| Thickness (mm)     | 0.625       | 0.625       | 0.75                 | 0.75                 |
| Interval (mm)      | 0.625       | 0.625       | 0.5                  | 0.5                  |
| DFOV (cm)          | Lungs*      | Lungs*      | Lungs*               | Lungs*               |
| RECON 2            |             |             |                      |                      |
| Algorithm          | Standard    | Standard    | B31f                 | B31f                 |
| Thickness (mm)     | 0.625       | 0.625       | 0.75                 | 0.75                 |
| Interval (mm)      | 0.625       | 0.625       | 0.5                  | 0.5                  |
| DFOV (cm)          | Lungs*      | Lungs*      | Lungs*               | Lungs*               |

\* reconstruction field of view should encompass the widest diameter of the lung.

*Online supplements are not copyedited prior to posting.*

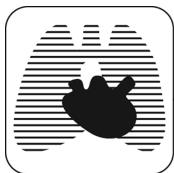**Results****e-Table 2 Self-Reported Respiratory Treatment Across Study Groups.**

| Reported Treatment**                                      | Control<br>N=46 | GOLD 2-AP<br>N=23 | GOLD 2-EP<br>N=23 | GOLD 4-AP<br>N=23 | GOLD 4-EP<br>N=23 |
|-----------------------------------------------------------|-----------------|-------------------|-------------------|-------------------|-------------------|
| Short-Acting Bronchodilators, n (%)                       | 6 (13)          | 10 (43)*          | 13 (57)*          | 18 (78)*          | 18 (78)*          |
| Long-Acting Bronchodilators, n (%)                        | 5 (11)          | 4 (17)            | 10 (43*)          | 13 (57)*          | 15 (65)*          |
| Inhaled Corticosteroids, n (%)                            | 0 (0)           | 1 (4)             | 2 (9)             | 8 (35)*           | 2 (9)†            |
| Long-Acting $\beta$ -Agonists plus Corticosteroids, n (%) | 2 (4)           | 5 (22)            | 10 (43)*          | 11 (48)*          | 13 (57)*          |

\*\*Short-Acting Bronchodilators: Albuterol, Ipratropium, Metaproterenol, and Albuterol + Ipratropium; Long-Acting

Bronchodilators: Formoterol, Salmeterol, and Tiotropium; Inhaled Corticosteroids: Budesonide, Fluticasone, and

Triamcinolone; Long-Acting  $\beta$ - Agonists + Corticosteroids: Formoterol plus Budesonide and Salmeterol plus Fluticasone.

GOLD: Global Initiative for Obstructive Lung Disease; AP: airway-predominant CT subtype; EP: emphysema-predominant CT subtype.

\*P <0.05 vs. controls; †P <0.05 vs GOLD 4- AP

*Online supplements are not copyedited prior to posting.*

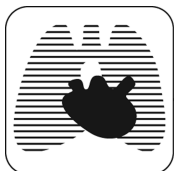**e-Table 3** CT lobar measures of volume, emphysema, and airway diameter (N= 130)

| CT Measure                                                                 | Control     | GOLD 2-AP   | GOLD 2-EP    | GOLD 4-AP   | GOLD 4-EP    | All         |
|----------------------------------------------------------------------------|-------------|-------------|--------------|-------------|--------------|-------------|
| Volume of RUL<br>At End Tidal Breathing (ml)                               | 610 ± 165   | 722 ± 207   | 1083 ± 319*† | 1004 ± 235* | 1231 ± 302*† | 863 ± 335   |
| Volume of RUL<br>At Full Inspiration (ml)                                  | 1099 ± 249  | 1099 ± 282  | 1708 ± 497*  | 1304 ± 307  | 1551 ± 412*  | 1300 ± 415  |
| Volume of RLL<br>At End Tidal Breathing (ml)                               | 639 ± 187   | 696 ± 208   | 806 ± 311    | 1055 ± 302* | 1279 ± 318*  | 839 ± 345   |
| Volume of RLL<br>At Full Inspiration (ml)                                  | 1371 ± 358  | 1146 ± 298  | 1510 ± 417†  | 1342 ± 262  | 1670 ± 360*† | 1396 ± 377  |
| Emphysema of<br>RUL (%)                                                    | 1 ± 2       | 2 ± 1       | 36 ± 13*†    | 8 ± 5*      | 45 ± 12*†    | 15 ± 19     |
| Emphysema of<br>RLL (%)                                                    | 1 ± 1       | 1 ± 1       | 20 ± 11*†    | 6 ± 3       | 38 ± 13*†    | 10 ± 15     |
| Inner Diameter<br>of RB1 3 <sup>rd</sup> AG<br>at End Tidal Breathing (mm) | 3.86 ± 1.29 | 4.00 ± 1.16 | 4.35 ± 1.02  | 3.47 ± 1.05 | 4.10 ± 1.66  | 3.91 ± 1.27 |
| Inner Diameter<br>of RB1 4 <sup>th</sup> AG<br>at End Tidal Breathing (mm) | 2.61 ± 0.62 | 2.78 ± 0.65 | 2.94 ± 0.58  | 2.44 ± 0.78 | 3.09 ± 0.87  | 2.75 ± 0.72 |

*Online supplements are not copyedited prior to posting.*





---

|                                                                             |             |             |             |             |             |             |
|-----------------------------------------------------------------------------|-------------|-------------|-------------|-------------|-------------|-------------|
| Inner Diameter<br>of RB10 3 <sup>rd</sup> AG<br>at End Tidal Breathing (mm) | 3.62 ± 1.19 | 3.60 ± 0.93 | 3.60 ± 0.91 | 3.70 ± 1.14 | 3.75 ± 0.93 | 3.65 ± 1.05 |
| Inner Diameter<br>of RB10 4 <sup>th</sup> AG<br>at End Tidal Breathing (mm) | 2.85 ± 1.04 | 2.94 ± 0.66 | 2.87 ± 1.01 | 2.84 ± 0.84 | 3.06 ± 0.76 | 2.93 ± 0.91 |

---

Data are presented as mean ± SD.

\*P<0.05 vs. control; †P<0.05 vs. Airway-predominant CT subtype within a GOLD stage.

GOLD: Global Initiative for Obstructive Lung Disease; AP: airway-predominant CT subtype; EP: emphysema-predominant CT subtype. RUL: right upper lobe; RLL: right lower lobe; RB1: right upper lobe apical bronchus; RB10: right lower lobe posterior basal bronchus; AG: airway generation.

*Online supplements are not copyedited prior to posting.*

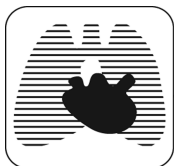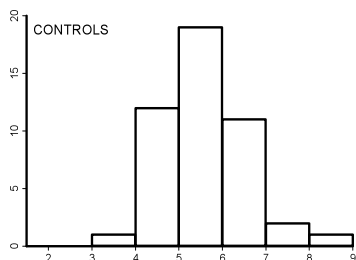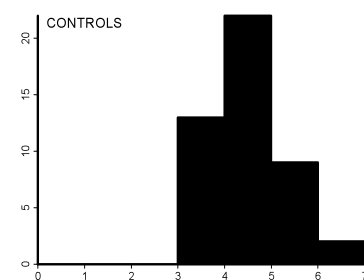

Subject  
Frequency

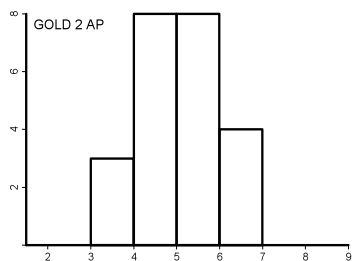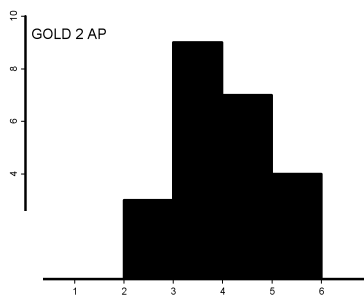

Subject  
Frequency

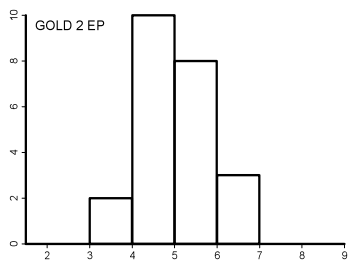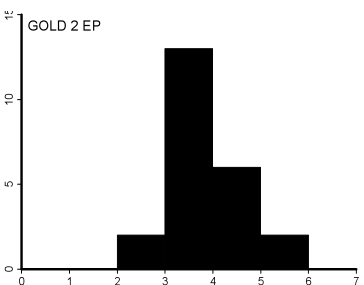

Diameter of the 3<sup>rd</sup> Airway Generation (mm)

Diameter of the 4<sup>th</sup> Airway Generation (mm)

*Online supplements are not copyedited prior to posting.*

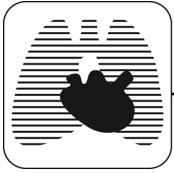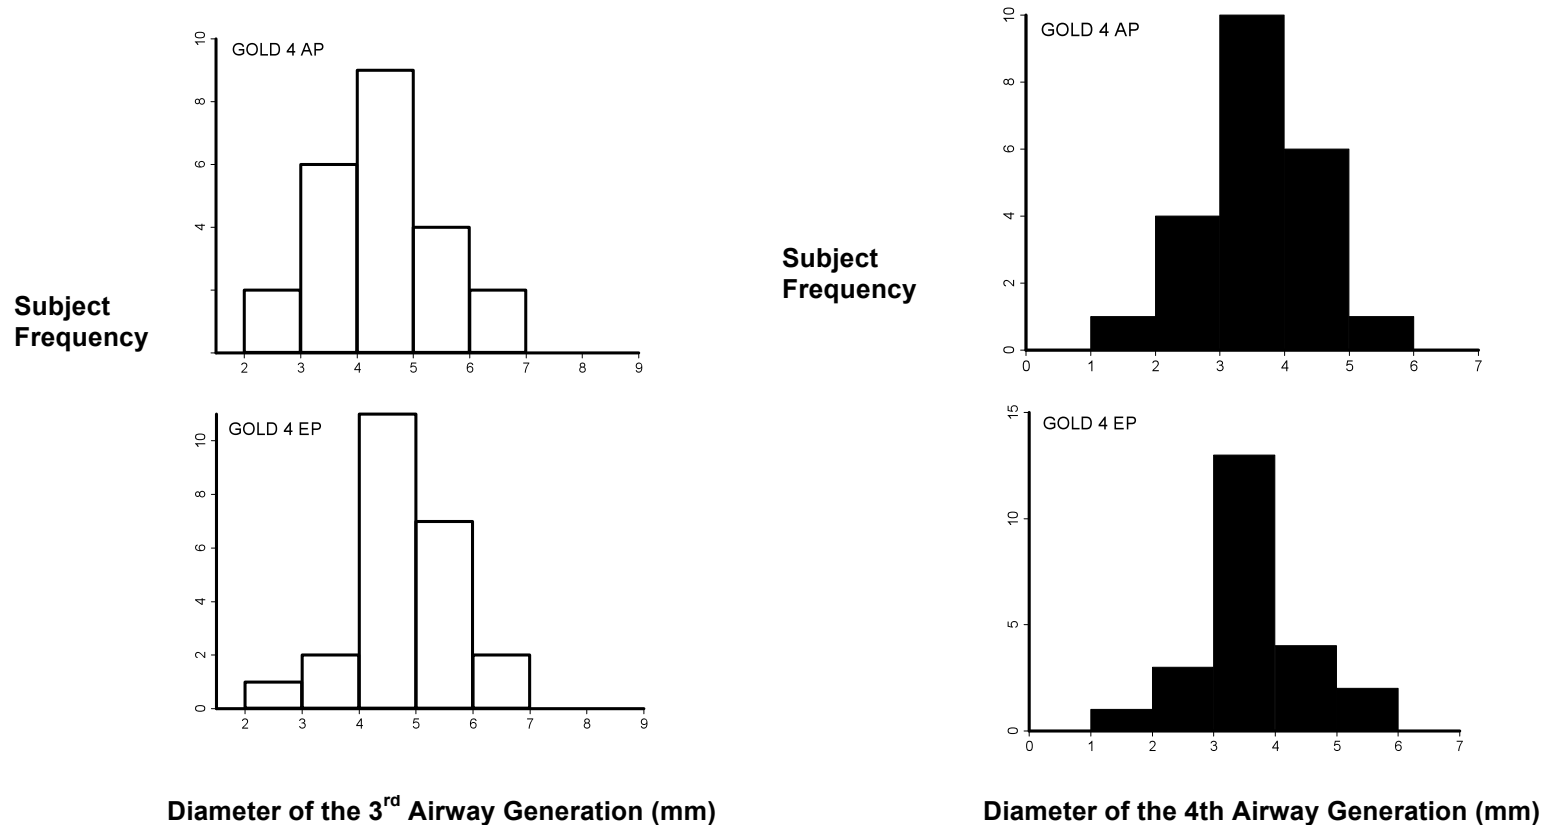

**e-Figure 1** Distribution of inner diameter of the 3<sup>rd</sup> (open bars) and 4<sup>th</sup> (filled bars) airway generations across smokers with normal lung function and those with GOLD 2 and 4 COPD (airway-predominant [AP] and emphysema-predominant [EP]). GOLD: Global Initiative for Obstructive Lung Disease.

*Online supplements are not copyedited prior to posting.*

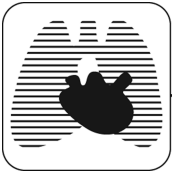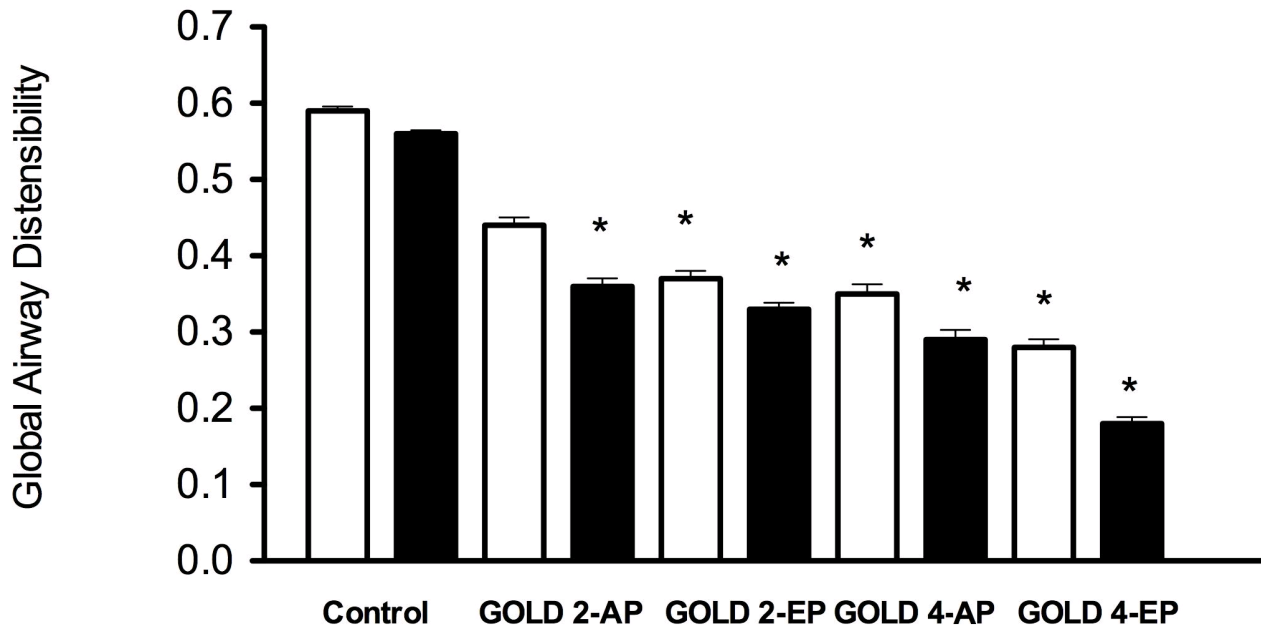

**e-Figure 2** Global distensibility (mean  $\pm$  SEM) of the 3<sup>rd</sup> (open bars) and the 4<sup>th</sup> (closed bars) airway generations from end tidal breathing to full inspiration by study group. Global distensibility was calculated using predicted rather than measured values for FRC and TLC. AP: airway-predominant CT subtype; EP: emphysema-predominant CT subtype; GOLD: Global Initiative for Obstructive Lung Disease. Global airway distensibility is defined in the methods section of this supplement.

\*P<0.05 vs. control.

*Online supplements are not copyedited prior to posting.*

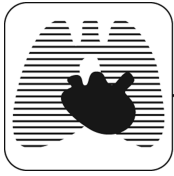

**e-Table 4** Correlation coefficients (r) between *lobar* airway distensibility and lobar emphysema.

| <i>Lobar</i><br>Emphysema (%) | <i>Lobar</i> Airway Distensibility       |         |       |         |                                           |         |       |         |
|-------------------------------|------------------------------------------|---------|-------|---------|-------------------------------------------|---------|-------|---------|
|                               | Airway Generation of the<br>RB1 Bronchus |         |       |         | Airway Generation of the<br>RB10 Bronchus |         |       |         |
|                               | 3rd                                      |         | 4th   |         | 3rd                                       |         | 4th   |         |
|                               | r                                        | P value | r     | P value | r                                         | P value | r     | P value |
| Right Upper Lobe              | -0.21                                    | 0.02    | -0.46 | <0.0001 |                                           |         |       |         |
| Right Lower Lobe              |                                          |         |       |         | -0.19                                     | 0.04    | -0.22 | 0.02    |

RB1: right upper lobe apical bronchus; RB10: right lower lobe posterior basal bronchus.

*Online supplements are not copyedited prior to posting.*



**e-Table 5** Multivariate linear regression model for global and *lobar* airway distensibility of the 4<sup>th</sup> airway generation in the postbronchodilator cohort (N=73)

| Model                                                                                                  | Parameter Estimate | 95% Confidence Interval | P value |
|--------------------------------------------------------------------------------------------------------|--------------------|-------------------------|---------|
| <b><i>Model 1</i></b>                                                                                  |                    |                         |         |
| <b><i>Global airway distensibility</i></b>                                                             |                    |                         |         |
| Whole-lung Emphysema (%)                                                                               | -0.004             | -0.008, -0.0003         | 0.04    |
| Wall Area Percent of the 4 <sup>th</sup> AG at End Tidal Breathing                                     | 0.01               | 0.002, 0.02             | 0.02    |
| <b><i>Model 2</i></b>                                                                                  |                    |                         |         |
| <b><i>Right upper lobe airway distensibility</i></b>                                                   |                    |                         |         |
| RUL Emphysema (%)                                                                                      | -0.003             | -0.005, -0.002          | 0.0001  |
| Wall Area Percent of the 4 <sup>th</sup> AG of the RUL apical bronchus at End Tidal Breathing          | 0.003              | -0.002, 0.007           | 0.22    |
| <b><i>Model 3</i></b>                                                                                  |                    |                         |         |
| <b><i>Right Lower Lobe Airway Distensibility</i></b>                                                   |                    |                         |         |
| RLL Emphysema (%)                                                                                      | -0.003             | -0.008, 0.002           | 0.29    |
| Wall Area Percent of the 4 <sup>th</sup> AG of the RLL posterior basal bronchus at End Tidal Breathing | 0.004              | -0.003, 0.02            | 0.09    |

Adjustment was done for age, gender, Body Mass Index, and pack years of smoking. Model R<sup>2</sup> was 0.33, 0.30, and 0.25 for global, right upper lobe, and right lower lobe airway distensibility, respectively. RUL: right upper lobe; RLL: right lower lobe; AG: airway generation.

*Online supplements are not copyedited prior to posting.*



### References

- 1 Regan EA, Hokanson JE, Murphy JR, et al. Genetic epidemiology of COPD (COPDGene) study design. *COPD* 2010; 7:32-43
- 2 Rabe KF, Hurd S, Anzueto A, et al. Global strategy for the diagnosis, management, and prevention of chronic obstructive pulmonary disease: GOLD executive summary. *Am J Respir Crit Care Med* 2007; 176:532-555
- 3 Mishima M, Hirai T, Itoh H, et al. Complexity of terminal airspace geometry assessed by lung computed tomography in normal subjects and patients with chronic obstructive pulmonary disease. *Proc Natl Acad Sci U S A* 1999; 96:8829-8834
- 4 Mahler DA, Weinberg DH, Wells CK, et al. The measurement of dyspnea. Contents, interobserver agreement, and physiologic correlates of two new clinical indexes. *Chest* 1984; 85:751-758
- 5 Standardization of Spirometry, 1994 Update. American Thoracic Society. *Am J Respir Crit Care Med* 1995; 152:1107-1136
- 6 Hankinson JL, Odencrantz JR, Fedan KB. Spirometric reference values from a sample of the general U.S. population. *Am J Respir Crit Care Med* 1999; 159:179-187
- 7 Wilson AG, Massarella GR, Pride NB. Elastic properties of airways in human lungs post mortem. *Am Rev Respir Dis* 1974; 110:716-729

*Online supplements are not copyedited prior to posting.*
